# Supplementary material for: Use of prospective hospital surveillance data to define spatiotemporal heterogeneity of malaria risk in coastal Kenya
Source: Springer Nature journal article supplement (doi:10.1186/s12936-015-1006-7), 2015-12-01
Supplement: MOESM2 [file 9761872]

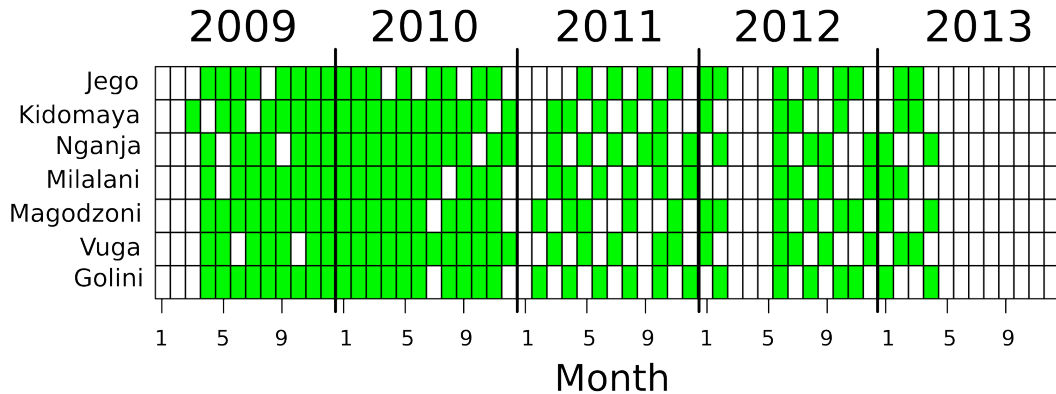

**Additional file 2. Timing of mosquito sampling sessions per each village during study period 2009-2013.** Green colour indicates months in which mosquito sampling was performed.
