# Supplementary material for: Use of prospective hospital surveillance data to define spatiotemporal heterogeneity of malaria risk in coastal Kenya
Source: Springer Nature journal article supplement (doi:10.1186/s12936-015-1006-7), 2015-12-01
Supplement: MOESM3 [file 9761872]

**Additional file 3 Results of model selection performed to find the best model used to analyse febrile illness data.** The table only reports the first six tested models.

| Model | <i>Gender</i> | <i>Dist shore</i> | <i>Rice</i> | <i>Development</i> | $f_1(\text{Age})$ | $f_2(\text{Month})$ | $f_3(\text{LLINs distr.})$ | $f_{\text{spat}}(\text{Com.})$ | $\text{rand}(\text{Com.})$ | $(\text{Month} * \text{Rice})$ | AIC     | $\Delta\text{AIC}$ |
|-------|---------------|-------------------|-------------|--------------------|-------------------|---------------------|----------------------------|--------------------------------|----------------------------|--------------------------------|---------|--------------------|
| 1     | +             | +                 | +           | +                  | +                 | +                   | +                          | +                              | +                          | +                              | 29252.1 | 0                  |
| 2     | -             | +                 | -           | +                  | +                 | +                   | +                          | +                              | +                          | -                              | 29248.4 | 3.7                |
| 3     | -             | -                 | +           | -                  | +                 | +                   | +                          | +                              | +                          | -                              | 29246.8 | 5.3                |
| 4     | +             | +                 | +           | -                  | +                 | +                   | +                          | +                              | +                          | -                              | 29244.7 | 7.4                |
| 5     | +             | +                 | +           | -                  | -                 | +                   | -                          | +                              | +                          | +                              | 29243.2 | 8.9                |
| 6     | -             | +                 | -           | +                  | +                 | -                   | +                          | +                              | +                          | -                              | 29241.3 | 10.8               |

‘+’= variable included; ‘-’=variable dropped
