# Supplementary material for: Use of prospective hospital surveillance data to define spatiotemporal heterogeneity of malaria risk in coastal Kenya
Source: Springer Nature journal article supplement (doi:10.1186/s12936-015-1006-7), 2015-12-01
Supplement: MOESM4 [file 9761872]

## Additional file 4 Results of model selection performed to find the best model

used to analyse entomological data. The table only reports the first six tested models.

---

| Model | <i>Rice</i> | <i>Year</i> | $f_i(\text{Month})$ | <i>rand(Village)</i> | AIC     | $\Delta\text{AIC}$ |
|-------|-------------|-------------|---------------------|----------------------|---------|--------------------|
| 1     | +           | +           | +                   | +                    | 11546.3 | 0                  |
| 2     | +           | -           | +                   | +                    | 11542.1 | 4.2                |
| 3     | -           | +           | +                   | +                    | 11538.4 | 7.9                |
| 4     | -           | +           | +                   | +                    | 11533.4 | 12.9               |
| 5     | -           | -           | +                   | +                    | 11531.5 | 14.8               |
| 6     | +           | +           | -                   | -                    | 11525.2 | 21.1               |

---

‘+’= variable included; ‘-’=variable dropped
